# Supplementary material for: Investigating risks for human colonisation with extended spectrum beta-lactamase producing E. coli and K. pneumoniae in Malawian households: a one health longitudinal cohort study
Source: bioRxiv or medRxiv preprint supplement (doi:10.1101/2022.08.16.22278508), 2022-08-21
Supplement: Supplementary file [file media-1.pdf]

**S1a Table.** Individual-level variables selected from the CRFs for analysis, including any groupings, outputs and transformations undertaken.

| Variable name           | Description                                                                                                      |
|-------------------------|------------------------------------------------------------------------------------------------------------------|
| Age*                    | Continuous, age at enrolment (years)                                                                             |
| Male                    | Binary, {1 = male, 0 = female}                                                                                   |
| Religion (Christianity) | Binary, {1 = faith reported as Christianity, 0 = other religion practiced}                                       |
| School (attendance)     | Binary, {1 = attend school, 0 = do not attend school}                                                            |
| School (work)           | Binary, {1 = work in/at school, 0 = do not work in/at school}                                                    |
| Healthcare (work)       | Binary, {1 = work in/at hospital, 0 = do not work in/at hospital}                                                |
| Hospital admission      | Binary, {1 = admitted overnight to hospital in last 6 months, 0 = not admitted over last 6 months}               |
| Hospital guardian       | Binary, {1 = been a guardian at hospital in last 6 months, 0 = not been a guardian at hospital in last 6 months} |
| Employed                | Binary, {1 = have regular job at recruitment, 0 = no job at recruitment}                                         |
| Residency               | Binary, {1 = resident for year or more at household, 0 = not resident for year}                                  |
| Travel (Outside region) | Binary, {1 = travel outside region (any purpose in last 6 months, 0 = no travel outside area in last 6 months)}  |
| HIV status              | Binary, {1 = HIV reactive, 0 = HIV non-reactive or unknown}                                                      |
| TB history              | Binary, {1 = ever had diagnosis of TB, 0 = never had TB}                                                         |
| Comorbidities           | Binary, {1 = 1 or more comorbidities, 0 = no comorbidities}                                                      |
| Medication              | Binary, {1 = take any prescribed regular medication, 0 = do not take any regular medication}                     |
| Unwell 4 weeks          | Binary, {1 = 1 or more unwell episodes in last 4 weeks, 0 = no illness episodes in last 4 weeks}                 |
| Unwell 3 months         | Binary, {1 = 1 or more unwell episodes in last 3 months, 0 = no illness episodes in last 3 months}               |
| ABU                     | Binary, {1 = 1 or more antibiotic courses taken in the last 6 months, 0 = no antibiotics taken in last 6 months} |

\*log-transformed

**S1b Table.** Household, WASH and sampling variables selected from the CRFs for analysis, including any outputs and transformations undertaken. Variables are grouped into reported, observed and laboratory categories and stratified by factor type.

|                    |                 | Variable                                            | Description                                                                                                                                                       |
|--------------------|-----------------|-----------------------------------------------------|-------------------------------------------------------------------------------------------------------------------------------------------------------------------|
| Household Factors  | Reported        | Number of people living in house*                   | Continuous, number of people cohabiting at baseline.                                                                                                              |
|                    |                 | Household income*                                   | Continuous, household income (MK) at baseline.                                                                                                                    |
|                    | Lab             | Share household with ESBL colonised humans          | Binary, {1 = yes [share with 1 or more ESBL colonised individuals within the same household], 0 = no [Do not share with ESBL colonised household members ]}       |
| Sanitation Factors | Observed        | Presence of drop hole cover                         | Binary, {1 = drop hole cover present, 0 = drop hole cover absent}                                                                                                 |
|                    |                 | Cleansing materials at toilet                       | Binary, {1 = cleansing material [any type] present, 0 = cleansing material [any type] absent}                                                                     |
|                    |                 | Visible human defecation                            | Binary, {1 = visible human stool [adult or child], 0 = no visible human stool}                                                                                    |
|                    | Reported        | Use of pit latrine                                  | Binary, {1 = use pit latrine, 0 = use other toilet type, or do not have toilet}                                                                                   |
|                    |                 | Toilet presence (any) at household                  | Binary, {1 = toilet present, 0 = toilet absent}                                                                                                                   |
|                    |                 | Open human defecation                               | Binary, {1 = open defecation reported [by 1 or more household members], 0 = no open defecation reported [by all household member]}                                |
|                    |                 | Sharing household toilet with non-household members | Binary, {1 = shared toilet used, 0 = do not share their toilet external to the household}                                                                         |
|                    |                 | Absence of disposal mechanism for animal waste      | Binary, {1 = no disposal mechanism for animal faeces, 0 = dispose of animal faeces by either sweeping them away, putting into a refuse pit or re-using as manure} |
|                    | Lab             | Household environmental ESBL contamination          | Binary, {1 = yes [at any point in the household during study], 0 = no [at all points during study]}                                                               |
|                    | Hygiene factors | Reported                                            | Facilities for hand washing (all areas) at household                                                                                                              |
| Observed           |                 | Presence of soap at (any) HWF                       | Binary, {1 = yes [present at one or more HWFs within the household], 0 = no [present at no HWFs within the household]}                                            |
| Lab                |                 | Household rinse water ESBL contamination            | Binary, {1 = yes [at any point in the household during study], 0 = no [at all points during study]}                                                               |
| Food Factors       | Reported        | Eat street food                                     | Binary, {1 = yes [supplement diet with street food at some points], 0 = no [never buy street food]}                                                               |
|                    |                 | Eat from shared plates                              | Binary, {1 = yes [use shared plates], 0 = no [do not use shared plates]}                                                                                          |
|                    |                 | Buy vegetables or fruit from the market             | Binary, {1 = yes [use vegetables or fruit from the market on any occasion], 0 = no [do not use market food or fruit]}                                             |

|                                              |                                                                                                                                   |                                                                                                             |                                                                                                                                              |
|----------------------------------------------|-----------------------------------------------------------------------------------------------------------------------------------|-------------------------------------------------------------------------------------------------------------|----------------------------------------------------------------------------------------------------------------------------------------------|
|                                              | Lab                                                                                                                               | Household food ESBL contamination                                                                           | Binary, {1 = yes [at any point in the household during study], 0 = no [at all points during study]}                                          |
| Water Factors                                | Observed                                                                                                                          | Is water stored in the house covered?                                                                       | Binary, {1 = yes [water stored at the house covered], 0 = no [water not stored at the house covered]}                                        |
|                                              | Reported                                                                                                                          | Is water stored in the house?                                                                               | Binary, {1 = yes [water stored at the house], 0 = no [water not stored at the house]}                                                        |
|                                              |                                                                                                                                   | Drinking water source piped into household                                                                  | Binary, {1 = yes [water source from outside the household], 0 = no [water source from pipe inside or directly outside the household]}        |
|                                              |                                                                                                                                   | Drinking water source kiosk                                                                                 | Binary, {1 = yes [water source from outside the household], 0 = no [water source from pipe inside or directly outside the household]}        |
|                                              |                                                                                                                                   | Drinking water source tubewell                                                                              | Binary, {1 = yes [water source from outside the household], 0 = no [water source from pipe inside or directly outside the household]}        |
|                                              |                                                                                                                                   | Alternative water used for cleaning utensils                                                                | Binary, {1 = yes [different water used for cleaning utensils than for drinking], 0 = no [same water used for cleaning utensils as drinking]} |
|                                              | Lab                                                                                                                               | Household source water ESBL contamination                                                                   | Binary, {1 = yes [at any point in the household during study], 0 = no [at all points during study]}                                          |
| Lab                                          | Household stored water ESBL contamination                                                                                         | Binary, {1 = yes [at any point in the household during study], 0 = no [at all points during study]}         |                                                                                                                                              |
| Animal Factors                               | Observed                                                                                                                          | Animal faeces seen around the area                                                                          | Binary, {1 = yes [any animal faeces seen around the household at any point], 0 = no [no animal faeces ever seen around the household]}       |
|                                              |                                                                                                                                   | Evidence of animal contact with food                                                                        | Binary, {1 = yes [animal seen in contact with food], 0 = no [no animal seen in contact with food]}                                           |
|                                              | Reported                                                                                                                          | Does the household own any animals?                                                                         | Binary, {1 = yes [household owns 1 or more animals], 0 = no [no animals owned by household]}                                                 |
|                                              |                                                                                                                                   | Own cattle or ruminant                                                                                      | Binary, {1 = yes [household owns 1 or more animals], 0 = no [no animals owned by household]}                                                 |
|                                              |                                                                                                                                   | Own poultry                                                                                                 | Binary, {1 = yes [household owns 1 or more animals], 0 = no [no animals owned by household]}                                                 |
|                                              |                                                                                                                                   | Own pet / companion animal                                                                                  | Binary, {1 = yes [household owns 1 or more animals], 0 = no [no animals owned by household]}                                                 |
|                                              |                                                                                                                                   | Own pigs                                                                                                    | Binary, {1 = yes [household owns 1 or more animals], 0 = no [no animals owned by household]}                                                 |
| Animals (any species) kept inside the house? | Binary, {1 = yes [if animals owned - they kept inside the house], 0 = no [if animals owned - they are not kept inside the house]} |                                                                                                             |                                                                                                                                              |
| Lab                                          | Household animal ESBL contamination                                                                                               | Binary, {1 = yes [at any point in the household animals during study], 0 = no [at all points during study]} |                                                                                                                                              |
| Broader Environment                          | Observed                                                                                                                          | Accumulation of water / wastewater (household environment)                                                  | Binary, {1 = yes [water seen external to the household], 0 = no [water not seen external to the household]}                                  |

|  |          |                                               |                                                                                                                                                                          |
|--|----------|-----------------------------------------------|--------------------------------------------------------------------------------------------------------------------------------------------------------------------------|
|  | Reported | Household member interaction with river water | Binary, {1 = yes [any adult or child at the household reportedly interact with river water], 0 = no [no adult or child at the household even interact with river water]} |
|  |          | Household member interaction with drains      | Binary, {1 = yes [any adult or child at the household reportedly interact with drains], 0 = no [no adult or child at the household even interact with drains]}           |
|  | Lab      | Drain ESBL contamination                      | Binary, {1 = yes [at any point during study], 0 = no [at all points during study]}                                                                                       |
|  |          | River ESBL contamination                      | Binary, {1 = yes [at any point during study], 0 = no [at all points during study]}                                                                                       |

*\*log-transformed*

**S1c Table.** Outcome variables and covariates.

| <b>Dependant variable</b> | <b>Description</b>                                                                                                                 |
|---------------------------|------------------------------------------------------------------------------------------------------------------------------------|
| ESBL<br>(positive)        | Binary, {1 = ESBL positive at single episode [with either KPN or EC], 0 = ESBL negative at single episode [with either KPN or EC]} |
| ESBL-E<br>(positive)      | Binary, {1 = ESBL <i>E. coli</i> positive at single episode, 0 = ESBL <i>E. coli</i> negative at single episode}                   |
| ESBL-K<br>(positive)      | Binary, {1 = ESBL <i>K. pneumoniae</i> positive at single episode, 0 = ESBL <i>K. pneumoniae</i> negative at single episode}       |
| <b>Covariates</b>         |                                                                                                                                    |
| Region                    | Categorical, {Urban / Peri-urban / rural}                                                                                          |
| Season                    | Binary, {1 = wet (October-April), 0 = dry (May-September)}                                                                         |

**S2 Table:** STROBE Statement

|                           | <b>Item No</b> | <b>Recommendation</b>                                                                                                                                                                                                                                                                                                                                                                                                                                                  | <b>Page No</b>                                                                                                   |
|---------------------------|----------------|------------------------------------------------------------------------------------------------------------------------------------------------------------------------------------------------------------------------------------------------------------------------------------------------------------------------------------------------------------------------------------------------------------------------------------------------------------------------|------------------------------------------------------------------------------------------------------------------|
| <b>Title and abstract</b> | 1              | (a) Indicate the study’s design with a commonly used term in the title or the abstract                                                                                                                                                                                                                                                                                                                                                                                 | 1 (title)                                                                                                        |
|                           |                | (b) Provide in the abstract an informative and balanced summary of what was done and what was found                                                                                                                                                                                                                                                                                                                                                                    | 3                                                                                                                |
| <b>Introduction</b>       |                |                                                                                                                                                                                                                                                                                                                                                                                                                                                                        |                                                                                                                  |
| Background/rationale      | 2              | Explain the scientific background and rationale for the investigation being reported                                                                                                                                                                                                                                                                                                                                                                                   | 5-6                                                                                                              |
| Objectives                | 3              | State specific objectives, including any prespecified hypotheses                                                                                                                                                                                                                                                                                                                                                                                                       | 6                                                                                                                |
| <b>Methods</b>            |                |                                                                                                                                                                                                                                                                                                                                                                                                                                                                        |                                                                                                                  |
| Study design              | 4              | Present key elements of study design early in the paper                                                                                                                                                                                                                                                                                                                                                                                                                | 6-7, including reference to online protocol                                                                      |
| Setting                   | 5              | Describe the setting, locations, and relevant dates, including periods of recruitment, exposure, follow-up, and data collection                                                                                                                                                                                                                                                                                                                                        | 6, setting and location described in protocol paper which is referenced in the text. All other aspects completed |
| Participants              | 6              | (a) <i>Cohort study</i> —Give the eligibility criteria, and the sources and methods of selection of participants. Describe methods of follow-up<br><i>Case-control study</i> —Give the eligibility criteria, and the sources and methods of case ascertainment and control selection. Give the rationale for the choice of cases and controls<br><i>Cross-sectional study</i> —Give the eligibility criteria, and the sources and methods of selection of participants | 6                                                                                                                |
|                           |                | (b) <i>Cohort study</i> —For matched studies, give matching criteria and number of exposed and unexposed<br><i>Case-control study</i> —For matched studies, give matching criteria and the number of controls per case                                                                                                                                                                                                                                                 | NA                                                                                                               |
| Variables                 | 7              | Clearly define all outcomes, exposures, predictors, potential confounders, and effect modifiers. Give diagnostic criteria, if applicable                                                                                                                                                                                                                                                                                                                               | 7-9 and S1a-c Tables.                                                                                            |
| Data sources/measurement  | 8*             | For each variable of interest, give sources of data and details of methods of assessment (measurement). Describe comparability of assessment methods if there is more than one group                                                                                                                                                                                                                                                                                   | S1a-c Tables. Statistical methods explained in pages 7-8. Data included in S3a-e                                 |
| Bias                      | 9              | Describe any efforts to address potential sources of bias                                                                                                                                                                                                                                                                                                                                                                                                              | 6, 8-9 and 22.                                                                                                   |
| Study size                | 10             | Explain how the study size was arrived at                                                                                                                                                                                                                                                                                                                                                                                                                              | 6, and detailed in protocol paper referenced in the manuscript.                                                  |

|                        |    |                                                                                                                                                                                                                                                                                                           |                                                           |
|------------------------|----|-----------------------------------------------------------------------------------------------------------------------------------------------------------------------------------------------------------------------------------------------------------------------------------------------------------|-----------------------------------------------------------|
| Quantitative variables | 11 | Explain how quantitative variables were handled in the analyses. If applicable, describe which groupings were chosen and why                                                                                                                                                                              | S1a-c Tables. Statistical methods explained in pages 7-8. |
| Statistical methods    | 12 | (a) Describe all statistical methods, including those used to control for confounding                                                                                                                                                                                                                     | 7-8                                                       |
|                        |    | (b) Describe any methods used to examine subgroups and interactions                                                                                                                                                                                                                                       | 7-8 and S1a-b figs                                        |
|                        |    | (c) Explain how missing data were addressed                                                                                                                                                                                                                                                               | 8                                                         |
|                        |    | (d) <i>Cohort study</i> —If applicable, explain how loss to follow-up was addressed<br><i>Case-control study</i> —If applicable, explain how matching of cases and controls was addressed<br><i>Cross-sectional study</i> —If applicable, describe analytical methods taking account of sampling strategy | 8                                                         |
|                        |    | (e) Describe any sensitivity analyses                                                                                                                                                                                                                                                                     | NA                                                        |

Continued on next page

| <b>Results</b>           |     |                                                                                                                                                                                                              |                          |
|--------------------------|-----|--------------------------------------------------------------------------------------------------------------------------------------------------------------------------------------------------------------|--------------------------|
| Participants             | 13* | (a) Report numbers of individuals at each stage of study—eg numbers potentially eligible, examined for eligibility, confirmed eligible, included in the study, completing follow-up, and analysed            | 11                       |
|                          |     | (b) Give reasons for non-participation at each stage                                                                                                                                                         | 11                       |
|                          |     | (c) Consider use of a flow diagram                                                                                                                                                                           | 11                       |
| Descriptive data         | 14* | (a) Give characteristics of study participants (eg demographic, clinical, social) and information on exposures and potential confounders                                                                     | 11-12                    |
|                          |     | (b) Indicate number of participants with missing data for each variable of interest                                                                                                                          | NA                       |
|                          |     | (c) <i>Cohort study</i> —Summarise follow-up time (eg, average and total amount)                                                                                                                             | 9                        |
| Outcome data             | 15* | <i>Cohort study</i> —Report numbers of outcome events or summary measures over time                                                                                                                          | 17-20                    |
|                          |     | <i>Case-control study</i> —Report numbers in each exposure category, or summary measures of exposure                                                                                                         | NA                       |
|                          |     | <i>Cross-sectional study</i> —Report numbers of outcome events or summary measures                                                                                                                           | NA                       |
| Main results             | 16  | (a) Give unadjusted estimates and, if applicable, confounder-adjusted estimates and their precision (eg, 95% confidence interval). Make clear which confounders were adjusted for and why they were included | 17-20                    |
|                          |     | (b) Report category boundaries when continuous variables were categorized                                                                                                                                    | 10-11, 14-15,            |
|                          |     | (c) If relevant, consider translating estimates of relative risk into absolute risk for a meaningful time period                                                                                             | NA                       |
| Other analyses           | 17  | Report other analyses done—eg analyses of subgroups and interactions, and sensitivity analyses                                                                                                               | Supplementary data       |
| <b>Discussion</b>        |     |                                                                                                                                                                                                              |                          |
| Key results              | 18  | Summarise key results with reference to study objectives                                                                                                                                                     | 20                       |
| Limitations              | 19  | Discuss limitations of the study, taking into account sources of potential bias or imprecision. Discuss both direction and magnitude of any potential bias                                                   | 22                       |
| Interpretation           | 20  | Give a cautious overall interpretation of results considering objectives, limitations, multiplicity of analyses, results from similar studies, and other relevant evidence                                   | 22-23                    |
| Generalisability         | 21  | Discuss the generalisability (external validity) of the study results                                                                                                                                        | 22-23                    |
| <b>Other information</b> |     |                                                                                                                                                                                                              |                          |
| Funding                  | 22  | Give the source of funding and the role of the funders for the present study and, if applicable, for the original study on which the present article is based                                                | Listed during submission |



**S4a Table.** Household (baseline) ABU from urban, peri-urban and rural sites.

|                                                |            | Antibiotic choice <sup>^</sup> |              |                   |            |            |               |                |             |              |            |               |                  |
|------------------------------------------------|------------|--------------------------------|--------------|-------------------|------------|------------|---------------|----------------|-------------|--------------|------------|---------------|------------------|
| Variable                                       | Site       | Total antibiotics              | Amoxicillin  | Benzylopenicillin | Cefuroxime | Cefixime   | Ciprofloxacin | Co-trimoxazole | Doxycycline | Erythromycin | Gentamicin | Metronidazole | Other or Unknown |
| Antibiotic usage in household participants     | Urban      | n=63                           | n=24 (38.1%) | n=2 (3.2%)        | n=0 (0.0%) | n=0 (0.0%) | n=2 (3.2%)    | n=20 (31.7%)   | n=0 (0.0%)  | n=2 (3.2%)   | n=3 (4.8%) | n=7 (11.1%)   | n=3 (4.8%)       |
|                                                | Peri-urban | n=40                           | n=9 (22.5%)  | n=0 (0.0%)        | n=0 (0.0%) | n=0 (0.0%) | n=3 (7.5%)    | n=17 (42.5%)   | n=0 (0.0%)  | n=1 (2.5%)   | n=1 (2.5%) | n=8 (20.0%)   | n=1 (2.5%)       |
|                                                | Rural      | n=78                           | n=31 (39.7%) | n=1 (1.3%)        | n=1 (1.3%) | n=1 (1.3%) | n=2 (2.6%)    | n=28 (35.9%)   | n=2 (2.6%)  | n=1 (1.3%)   | n=2 (2.6%) | n=8 (10.3%)   | n=1 (1.3%)       |
| Antibiotic used in last 4 weeks                | Urban      | n=21                           | n=5 (23.8%)  | n=0 (0.0%)        | n=0 (0.0%) | n=0 (0.0%) | n=1 (4.8%)    | n=10 (47.6%)   | n=0 (0.0%)  | n=0 (0.0%)   | n=1 (4.8%) | n=2 (9.5%)    | n=2 (9.5%)       |
|                                                | Peri-urban | n=24                           | n=4 (16.7%)  | n=0 (0.0%)        | n=0 (0.0%) | n=0 (0.0%) | n=1 (4.2%)    | n=12 (50.0%)   | n=0 (0.0%)  | n=0 (0.0%)   | n=1 (4.2%) | n=5 (20.8%)   | n=1 (4.2%)       |
|                                                | Rural      | n=29                           | n=12 (41.4%) | n=0 (0.0%)        | n=0 (0.0%) | n=0 (0.0%) | n=1 (3.4%)    | n=12 (41.4%)   | n=0 (0.0%)  | n=0 (0.0%)   | n=0 (0.0%) | n=3 (10.3%)   | n=1 (3.4%)       |
| Antibiotic used in last 4 weeks to 3 months    | Urban      | n=24                           | n=8 (33.3%)  | n=1 (4.2%)        | n=0 (0.0%) | n=0 (0.0%) | n=1 (4.2%)    | n=6 (25.0%)    | n=0 (0.0%)  | n=2 (8.3%)   | n=1 (4.2%) | n=4 (16.7%)   | n=1 (4.2%)       |
|                                                | Peri-urban | n=8                            | n=3 (32.5%)  | n=0 (0.0%)        | n=0 (0.0%) | n=0 (0.0%) | n=1 (12.5%)   | n=2 (25.0%)    | n=0 (0.0%)  | n=1 (12.5%)  | n=0 (0.0%) | n=1 (12.5%)   | n=0 (0.0%)       |
|                                                | Rural      | n=33                           | n=12 (36.4%) | n=1 (3.0%)        | n=1 (3.0%) | n=0 (0.0%) | n=1 (3.0%)    | n=11 (33.3%)   | n=2 (6.0%)  | n=0 (0.0%)   | n=2 (6.0%) | n=3 (9.1%)    | n=0 (0.0%)       |
| Antibiotic used in last 6 months* (healthcare) | Urban      | n=15                           | n=9 (60.0%)  | n=1 (6.7%)        | n=0 (0.0%) | n=0 (0.0%) | n=0 (0.0%)    | n=3 (20.0%)    | n=0 (0.0%)  | n=0 (0.0%)   | n=1 (6.7%) | n=1 (6.7%)    | n=0 (0.0%)       |
|                                                | Peri-urban | n=3                            | n=0 (0.0%)   | n=0 (0.0%)        | n=0 (0.0%) | n=0 (0.0%) | n=1 (33.3%)   | n=1 (33.3%)    | n=0 (0.0%)  | n=0 (0.0%)   | n=0 (0.0%) | n=1 (33.3%)   | n=0 (0.0%)       |
|                                                | Rural      | n=15                           | n=7 (46.7%)  | n=0 (0.0%)        | n=0 (0.0%) | n=1 (6.7%) | n=0 (0.0%)    | n=4 (26.7%)    | n=0 (0.0%)  | n=1 (6.7%)   | n=0 (0.0%) | n=2 (13.3%)   | n=0 (0.0%)       |
| Antibiotic used at baseline                    | Urban      | n=3                            | n=2 (66.7%)  | n=0 (0.0%)        | n=0 (0.0%) | n=0 (0.0%) | n=0 (0.0%)    | n=1 (33.3%)    | n=0 (0.0%)  | n=0 (0.0%)   | n=0 (0.0%) | n=0 (0.0%)    | n=0 (0.0%)       |
|                                                | Peri-urban | n=5                            | n=2 (40.0%)  | n=0 (0.0%)        | n=0 (0.0%) | n=0 (0.0%) | n=0 (0.0%)    | n=2 (40.0%)    | n=0 (0.0%)  | n=0 (0.0%)   | n=0 (0.0%) | n=1 (20.0%)   | n=0 (0.0%)       |
|                                                | Rural      | n=1                            | n=0 (0.0%)   | n=0 (0.0%)        | n=0 (0.0%) | n=0 (0.0%) | n=0 (0.0%)    | n=1 (100%)     | n=0 (0.0%)  | n=0 (0.0%)   | n=0 (0.0%) | n=0 (0.0%)    | n=0 (0.0%)       |

<sup>^</sup>Grey = Total usage, where antibiotics were selected by ≥1 households in region. Blue = cumulative total of antibiotics used. Yellow = antibiotic selected by ≥1 households in region. White = antibiotic not selected. \*Provided to participant at healthcare services during an acute presentation.

**S4b Table.** AMU in different age groups

| Reported ABU                                   |    | n (%)      |            |            | <i>p</i>        |
|------------------------------------------------|----|------------|------------|------------|-----------------|
|                                                |    | Child      | Adolescent | Adult      |                 |
| <b>Antibiotic use by age group<sup>§</sup></b> |    |            |            |            |                 |
| Antibiotic usage (total all regions)           | NA | 49 (32.5%) | 39 (11.9%) | 59 (12.2%) | <b>&gt;.001</b> |

<sup>§</sup>Total Adult (>17) = 485, Adolescents (5-17) = 329, and Children <5 = 151

**S5 Table.** Domestic animal and livestock ownership and husbandry

| <b>Household ownership</b>                   | <b>n</b>     |              |                   |              |
|----------------------------------------------|--------------|--------------|-------------------|--------------|
|                                              | <b>Total</b> | <b>Urban</b> | <b>Peri-urban</b> | <b>Rural</b> |
| <b>Total number of animals owned</b>         | 2169         | 213          | 704               | 1252         |
| <b>Species of animals owned<sup>^</sup></b>  |              |              |                   |              |
| Number of chickens                           | 919          | 152          | 315               | 452          |
| Number of doves                              | 442          | 10           | 250               | 182          |
| Number of ducks                              | 67           | 14           | 8                 | 45           |
| Number of guinea fowl                        | 34           | 0            | 0                 | 34           |
| Number of turkeys                            | 8            | 0            | 8                 | 0            |
| Number of dogs                               | 100          | 27           | 44                | 29           |
| Number of cats                               | 31           | 10           | 11                | 10           |
| Number of cattle                             | 23           | 0            | 0                 | 74           |
| Number of pigs                               | 17           | 0            | 20                | 55           |
| Number of goats                              | 419          | 0            | 48                | 371          |
| <b>Husbandry characteristics</b>             |              |              |                   |              |
| <b>Where are animals kept?</b>               |              |              |                   |              |
| <b>Chickens</b>                              |              |              |                   |              |
| In the house                                 | 70 (60.3%)   | 15 (83.3%)   | 25 (64.1%)        | 30 (50.8%)   |
| Shelter /Boma within household compound      | 33 (28.4%)   | 2 (11.1%)    | 12 (30.8%)        | 19 (32.2%)   |
| Shelter /Boma outside the household compound | 9 (7.8%)     | 1 (5.6%)     | 1 (2.6%)          | 7 (11.9%)    |
| Other                                        | 4 (3.4%)     | 0 (0.0%)     | 1 (2.6%)          | 3 (5.1%)     |
| <b>Dogs</b>                                  |              |              |                   |              |
| Free roaming                                 | 34 (79.1%)   | 9 (64.3%)    | 15 (78.9%)        | 10 (100.0%)  |
| Shelter /Boma outside the household compound | 1 (2.3%)     | 1 (7.1%)     | 0 (0.0%)          | 0 (0.0%)     |
| Shelter /Boma within household compound      | 8 (18.6%)    | 4 (28.6%)    | 4 (21.1%)         | 0 (0.0%)     |
| <b>Cattle</b>                                |              |              |                   |              |
| Shelter /Boma within household compound      | 11 (47.8%)   | NA           | NA                | 11 (47.8%)   |
| Shelter /Boma outside the household compound | 11 (47.8%)   | NA           | NA                | 11 (47.8%)   |
| Other                                        | 1 (4.4%)     | NA           | NA                | 1 (4.2%)     |
| <b>Goats</b>                                 |              |              |                   |              |
| In the house                                 | 8 (16.3%)    | NA           | 5 (41.7%)         | 3 (8.1%)     |
| Shelter /Boma within household compound      | 28 (57.1%)   | NA           | 6 (50.0%)         | 22 (59.5%)   |
| Shelter /Boma outside the household compound | 12 (24.5%)   | NA           | 1 (8.3%)          | 11 (29.7%)   |
| Free roaming                                 | 1 (2.0%)     | NA           | 0 (0.0%)          | 1 (2.7%)     |
| <b>Pigs</b>                                  |              |              |                   |              |
| Shelter /Boma within household compound      | 10 (58.8%)   | NA           | 5 (100.0%)        | 5 (41.7%)    |
| Shelter /Boma outside the household compound | 6 (35.3%)    | NA           | 0 (0.0%)          | 6 (50.0%)    |
| Free roaming                                 | 1 (5.9%)     | NA           | 0 (0.0%)          | 1 (8.3%)     |

---

**Livestock production system**

---

**Beef cattle**

|                  |        |    |    |            |
|------------------|--------|----|----|------------|
| Zero Grazing     | 2 (%)  | NA | NA | 2 (10.0%)  |
| Communal Grazing | 15 (%) | NA | NA | 15 (75.0%) |
| Pastoral         | 3 (%)  | NA | NA | 3 (15.0%)  |

**Dairy cattle**

|          |       |    |    |            |
|----------|-------|----|----|------------|
| Pastoral | 4 (%) | NA | NA | 4 (100.0%) |
|----------|-------|----|----|------------|

**Small ruminants**

|                  |        |    |           |            |
|------------------|--------|----|-----------|------------|
| Zero Grazing     | 8 (%)  | NA | 6 (50.0%) | 2 (5.4%)   |
| Communal Grazing | 26 (%) | NA | 6 (50.0%) | 20 (54.1%) |
| Pastoral         | 15 (%) | NA | 0 (0.0%)  | 15 (40.5%) |

---

**S6 Table.** Healthcare choices for household animals

|             |             | Response to sickness in household animals |                                |                                               |                                    |                                        |                            |                         |              |
|-------------|-------------|-------------------------------------------|--------------------------------|-----------------------------------------------|------------------------------------|----------------------------------------|----------------------------|-------------------------|--------------|
| Animal      | Site        | Consult a governmental veterinarian       | Consult a private veterinarian | Use medication from a veterinarian drug store | Use left-over or vet applied drugs | Get medications from friends or family | Use traditional medication | Kill animal (+/- eaten) | Nothing      |
| Cattle      | Urban       | NA                                        | NA                             | NA                                            | NA                                 | NA                                     | NA                         | NA                      | NA           |
|             | Peri-urban  | NA                                        | NA                             | NA                                            | NA                                 | NA                                     | NA                         | NA                      | NA           |
|             | Rural       | n=6                                       | n=1                            | n=1                                           | n=1                                | n=1                                    | n=0                        | n=0                     | n=9          |
| Goats       | Urban       | NA                                        | NA                             | NA                                            | NA                                 | NA                                     | NA                         | NA                      | NA           |
|             | Peri-urban  | n=2                                       | n=1                            | n=0                                           | n=1                                | n=0                                    | n=4                        | n=0                     | n=3          |
|             | Rural       | n=9                                       | n=2                            | n=4                                           | n=2                                | n=0                                    | n=1                        | n=0                     | n=9          |
| Pigs        | Urban       | NA                                        | NA                             | NA                                            | NA                                 | NA                                     | NA                         | NA                      | NA           |
|             | Peri-urban  | n=1                                       | n=1                            | n=1                                           | n=0                                | n=0                                    | n=0                        | n=0                     | n=1          |
|             | Rural       | n=2                                       | n=0                            | n=1                                           | n=0                                | n=0                                    | n=1                        | n=0                     | n=6          |
| Poultry     | Urban       | n=0                                       | n=1                            | n=3                                           | n=0                                | n=0                                    | n=3                        | n=1                     | n=6          |
|             | Peri-urban  | n=7                                       | n=1                            | n=4                                           | n=2                                | n=0                                    | n=8                        | n=1                     | n=6          |
|             | Rural       | n=7                                       | n=2                            | n=7                                           | n=2                                | n=0                                    | n=5                        | n=5                     | n=17         |
| All animals | All regions | n=34 (21.4%)                              | n=9 (5.6%)                     | n=21 (13.2%)                                  | n=8 (5.0%)                         | n=1 (0.6%)                             | n=22 (13.8%)               | n=7 (4.4%)              | n=57 (35.8%) |

^ Yellow = selected by  $\geq 1$  households in region. White = not selected. Grey = NA.

**S7 Table.** Numbers of samples screened for ESBL *E. coli* and ESBL *K. pneumoniae*, stratified by sample type and region.

| Broad sample type    | Sample number n (%) |              |              |              |
|----------------------|---------------------|--------------|--------------|--------------|
|                      | Total               | Urban        | Peri-urban   | Rural        |
| Human stool          | 2845 (23.8%)        | 821 (22.3%)  | 982 (24.4%)  | 1042 (24.3%) |
| Animal stool         | 973 (8.1%)          | 118 (3.2%)   | 229 (5.7%)   | 626 (14.6%)  |
| Environment          | 8157 (68.1%)        | 2736 (74.5%) | 2807 (69.9%) | 2614 (60.1%) |
| Food                 | 1168 (9.8%)         | 333 (9.1%)   | 440 (11.0%)  | 395 (9.2%)   |
| Drinking water       | 1254 (10.5%)        | 532 (14.5%)  | 449 (11.2%)  | 273 (6.4%)   |
| Source water         | 527 (4.4%)          | 79 (2.1%)    | 216 (5.4%)   | 232 (5.4%)   |
| Household surfaces   | 2458 (20.5%)        | 766 (20.8%)  | 744 (18.5%)  | 948 (22.1%)  |
| Household floor      | 745 (6.2%)          | 247 (6.7%)   | 244 (6.1%)   | 254 (5.9%)   |
| Clothing             | 742 (6.2%)          | 245 (6.7%)   | 242 (6.0%)   | 255 (5.9%)   |
| Hand-contact samples | 451 (3.8%)          | 129 (3.5%)   | 69 (1.7%)    | 253 (5.9%)   |
| Household drains     | 300 (2.5%)          | 151 (4.1%)   | 149 (3.7%)   | n=0 (0.0%)   |
| River water          | 512 (4.3%)          | 254 (6.9%)   | 254 (6.3%)   | 4 (0.1%)     |
| <b>TOTAL</b>         | <b>11975</b>        | <b>3675</b>  | <b>4018</b>  | <b>4282</b>  |

**S8a Table.** Regional univariate analysis of WASH and individual variables against human ESBL *E. coli* colonisation

| Characteristic               | Region | n   | OR          | 95% CI            | p value          | Model inclusion |
|------------------------------|--------|-----|-------------|-------------------|------------------|-----------------|
| Season (wet)                 | Urban  | 813 | 1.11        | 0.84,1.47         | 0.5              | Yes             |
|                              | Peri   | 971 | <b>1.92</b> | <b>1.47,2.53</b>  | <b>&lt;0.001</b> |                 |
|                              | Rural  | 938 | 1.29        | 0.98,1.69         | 0.067            |                 |
| Male sex                     | Urban  | 813 | 0.82        | 0.61,1.09         | 0.2              | No              |
|                              | Peri   | 971 | 0.93        | 0.71,1.22         | 0.6              |                 |
|                              | Rural  | 938 | 0.97        | 0.66,1.14         | 0.3              |                 |
| Age (log)                    | Urban  | 813 | <b>1.14</b> | <b>1.01,1.29</b>  | <b>0.030</b>     | Yes             |
|                              | Peri   | 971 | 1.07        | 0.94,1.21         | 0.3              |                 |
|                              | Rural  | 938 | 1.07        | 0.95,1.21         | 0.3              |                 |
| ABU<br>(Last 6 months)       | Urban  | 813 | 1.01        | 0.71,1.45         | >0.9             | No              |
|                              | Peri   | 971 | 0.89        | 0.57,1.37         | 0.6              |                 |
|                              | Rural  | 938 | 1.15        | 0.83,1.57         | 0.4              |                 |
| HIV reactive                 | Urban  | 813 | 0.85        | 0.48,1.49         | 0.6              | No              |
|                              | Peri   | 971 | 0.86        | 0.49,1.47         | 0.6              |                 |
|                              | Rural  | 938 | 1.23        | 0.77,1.94         | 0.4              |                 |
| Household density (log)      | Urban  | 813 | 1.17        | 0.82,1.67         | 0.4              | Yes             |
|                              | Peri   | 971 | 0.99        | 0.71,1.39         | >0.9             |                 |
|                              | Rural  | 938 | <b>0.66</b> | <b>0.45,0.97</b>  | <b>0.034</b>     |                 |
| Income<br>(>40,000MK/month)  | Urban  | 813 | 0.91        | 0.69,1.21         | 0.5              | No              |
|                              | Peri   | 971 | 1.04        | 0.8,1.37          | 0.8              |                 |
|                              | Rural  | 938 | 0.84        | 0.64,1.11         | 0.2              |                 |
| Shared Toilet                | Urban  | 813 | 1.02        | 0.77,1.35         | 0.9              | Yes             |
|                              | Peri   | 971 | <b>1.37</b> | <b>1.04, 1.81</b> | <b>0.026</b>     |                 |
|                              | Rural  | 938 | 0.86        | 0.63,1.18         | 0.4              |                 |
| Drophole Present             | Urban  | 813 | 0.80        | 0.55, 1.15        | 0.2              | Yes             |
|                              | Peri   | 971 | <b>0.59</b> | <b>0.44,0.79</b>  | <b>&lt;0.001</b> |                 |
|                              | Rural  | 938 | 1.08        | 0.81,1.44         | 0.6              |                 |
| Cleaning Materials available | Urban  | 813 | 1.17        | 0.84,1.62         | 0.3              | Yes             |
|                              | Peri   | 971 | <b>0.65</b> | <b>0.49,0.84</b>  | <b>0.001</b>     |                 |
|                              | Rural  | 938 | 0.80        | 0.51,1.23         | 0.3              |                 |
| Human Feaces visible         | Urban  | 813 | 0.95        | 0.72,1.25         | 0.7              | Yes             |
|                              | Peri   | 971 | <b>1.47</b> | <b>1.08,2.01</b>  | <b>0.015</b>     |                 |
|                              | Rural  | 938 | 0.82        | 0.63,1.08         | 0.2              |                 |
| Human defecation practiced   | Urban  | 813 | 1.47        | 0.71,3.04         | 0.3              | Yes             |
|                              | Peri   | 971 | 1.02        | 0.68,1.52         | >0.9             |                 |
|                              | Rural  | 938 | <b>0.59</b> | <b>0.37,0.91</b>  | <b>0.021</b>     |                 |
| HWF present                  | Urban  | 813 | 1.15        | 0.87,1.52         | 0.3              | No              |
|                              | Peri   | 971 | 0.74        | 0.53,1.06         | 0.1              |                 |
|                              | Rural  | 938 | 1.07        | 0.82,1.40         | 0.6              |                 |
| Soap present                 | Urban  | 813 | <b>1.89</b> | <b>1.17,3.08</b>  | <b>0.010</b>     | Yes             |
|                              | Peri   | 971 | <b>0.74</b> | <b>0.56,0.98</b>  | <b>0.034</b>     |                 |
|                              | Rural  | 938 | <b>0.47</b> | <b>0.21,0.94</b>  | <b>0.044</b>     |                 |
| Stored water covered         | Urban  | 813 | <b>2.16</b> | <b>1.38,3.47</b>  | <b>&lt;0.001</b> | Yes             |

|                                |       |     |             |                  |                  |     |
|--------------------------------|-------|-----|-------------|------------------|------------------|-----|
|                                | Peri  | 971 | 1.30        | 0.97,1.75        | 0.082            |     |
|                                | Rural | 938 | <b>0.62</b> | <b>0.46,0.81</b> | <b>&lt;0.001</b> |     |
| Stored water covered and tap   | Urban | 813 | 0.83        | 0.62,1.10        | 0.2              | No  |
|                                | Peri  | 971 | 0.76        | 0.46,1.21        | 0.3              |     |
| Utensil water                  | Rural | 938 | 0.76        | 0.57,1.01        | 0.056            | No  |
|                                | Urban | 813 | 0.95        | 0.71,1.27        | 0.7              |     |
| Piped water (i.e. kiosk)       | Peri  | 971 | 1.43        | 0.93,2.18        | 0.10             | No  |
|                                | Rural | 938 | 1.22        | 0.84,1.74        | 0.3              |     |
| Tap water (i.e. household tap) | Urban | 813 | 0.97        | 0.73,1.29        | 0.9              | Yes |
|                                | Peri  | 971 | <b>0.64</b> | <b>0.47,0.88</b> | <b>0.006</b>     |     |
| Tube well water                | Rural | 938 | <b>0.68</b> | <b>0.47,0.97</b> | <b>0.036</b>     | Yes |
|                                | Urban | 813 | 0.87        | 0.66,1.15        | 0.3              |     |
| Animal owned by household      | Peri  | 971 | 0.98        | 0.64,1.50        | >0.9             | Yes |
|                                | Rural | 938 | <b>2.38</b> | <b>1.19,4.86</b> | <b>0.015</b>     |     |
| Cattle or ruminant owned       | Urban | 813 | <b>2.53</b> | <b>1.45,4.54</b> | <b>0.001</b>     | Yes |
|                                | Peri  | 971 | <b>1.37</b> | <b>1.04,1.82</b> | <b>0.027</b>     |     |
| Poultry owned                  | Rural | 938 | 1.31        | 0.93,1.86        | 0.12             | Yes |
|                                | Urban | 813 | <b>1.55</b> | <b>1.17,2.06</b> | <b>0.002</b>     |     |
| Animal kept inside house       | Peri  | 971 | 0.99        | 0.75,1.30        | >0.9             | Yes |
|                                | Rural | 938 | <b>0.54</b> | <b>0.37,0.78</b> | <b>0.001</b>     |     |
| Pet owned                      | Urban | 813 | NA          | NA               | NA               | No  |
|                                | Peri  | 971 | 2.33        | 1.64,1.11        | 0.2              |     |
| Pig owned                      | Rural | 938 | 0.89        | 0.68,1.17        | 0.4              | Yes |
|                                | Urban | 813 | <b>1.61</b> | <b>1.15,2.26</b> | <b>0.005</b>     |     |
| Animal interacting with food   | Peri  | 971 | 0.85        | 0.64,1.11        | 0.2              | Yes |
|                                | Rural | 938 | 0.98        | 0.72,1.32        | 0.9              |     |
| Animal faeces seen             | Urban | 813 | 1.24        | 0.90,1.69        | 0.2              | Yes |
|                                | Peri  | 971 | 0.85        | 0.62,1.17        | 0.3              |     |
| River water exposure           | Rural | 938 | <b>0.66</b> | <b>0.48,0.91</b> | <b>0.012</b>     | Yes |
|                                | Urban | 813 | NA          | NA               | NA               |     |
| Drain water exposure           | Peri  | 971 | <b>0.30</b> | <b>0.09,0.78</b> | <b>0.026</b>     | Yes |
|                                | Rural | 938 | 0.93        | 0.66,1.31        | 0.7              |     |
| Street food use                | Urban | 813 | <b>1.50</b> | <b>1.05,2.15</b> | <b>0.024</b>     | Yes |
|                                | Peri  | 971 | 1.26        | 0.94,1.67        | 0.12             |     |
| Street food use                | Rural | 938 | <b>1.16</b> | <b>1.18,2.19</b> | <b>0.003</b>     | Yes |
|                                | Urban | 813 | <b>1.69</b> | <b>1.21,2.36</b> | <b>0.002</b>     |     |
| Street food use                | Peri  | 971 | <b>1.38</b> | <b>1.05,1.81</b> | <b>0.020</b>     | Yes |
|                                | Rural | 938 | <b>1.41</b> | <b>1.07,1.85</b> | <b>0.014</b>     |     |
| Street food use                | Urban | 813 | 1.02        | 0.77,1.34        | >0.9             | No  |
|                                | Peri  | 971 | 1.08        | 0.77,1.52        | 0.7              |     |
| Street food use                | Rural | 938 | NA          | NA               | NA               | No  |
|                                | Urban | 813 | 0.89        | 0.65,1.21        | 0.5              |     |
| Street food use                | Peri  | 971 | 1.33        | 1.00,1.78        | 0.054            | Yes |
|                                | Rural | 938 | <b>1.61</b> | <b>1.18,2.19</b> | <b>0.003</b>     |     |
| Street food use                | Urban | 813 | 0.76        | 0.44,1.29        | 0.3              | Yes |
|                                | Peri  | 971 | 1.30        | 0.86,1.94        | 0.2              |     |
| Street food use                | Rural | 938 | <b>0.49</b> | <b>0.27,0.84</b> | <b>0.013</b>     | Yes |
|                                | Urban | 813 | 0.51        | 0.33,1.09        | 0.2              |     |

|                     |       |     |             |                  |              |     |
|---------------------|-------|-----|-------------|------------------|--------------|-----|
|                     | Peri  | 971 | 1.56        | 1.01,2.49        | 0.053        |     |
|                     | Rural | 938 | <b>1.65</b> | <b>1.19,2.29</b> | <b>0.003</b> |     |
| Shared plates       | Urban | 813 | 0.79        | 0.58,1.09        | 0.2          | Yes |
|                     | Peri  | 971 | 1.12        | 0.85,1.47        | 0.4          |     |
|                     | Rural | 938 | <b>0.71</b> | <b>0.54,0.94</b> | <b>0.016</b> |     |
| Market produce used | Urban | 813 | 0.65        | 0.40,1.05        | 0.08         | No  |
|                     | Peri  | 971 | 0.69        | 0.45,1.05        | 0.078        |     |
|                     | Rural | 938 | 0.95        | 0.72,1.26        | 0.7          |     |

**S8b Table.** Regional univariate analysis of WASH and individual variables against human ESBL *K. pneumoniae* colonisation

| Characteristic               | Region | n   | OR          | 95% CI           | p value          | Model inclusion |
|------------------------------|--------|-----|-------------|------------------|------------------|-----------------|
| Season (wet)                 | Urban  | 813 | 1.30        | 0.85,2.00        | 0.2              | Yes             |
|                              | Peri   | 971 | <b>1.94</b> | <b>1.27,3.02</b> | <b>0.003</b>     |                 |
|                              | Rural  | 938 | <b>2.19</b> | <b>1.47,3.31</b> | <b>&lt;0.001</b> |                 |
| Male sex                     | Urban  | 813 | 0.69        | 0.43,1.09        | 0.12             | No              |
|                              | Peri   | 971 | 1.12        | 0.74,1.68        | 0.6              |                 |
|                              | Rural  | 938 | 0.84        | 0.56,1.23        | 0.4              |                 |
| Age (log)                    | Urban  | 813 | 0.97        | 0.82,1.17        | 0.8              | No              |
|                              | Peri   | 971 | 0.98        | 0.82,2.60        | 0.2              |                 |
|                              | Rural  | 938 | 1.02        | 0.86,1.21        | 0.8              |                 |
| ABU<br>(Last 6 months)       | Urban  | 813 | 1.28        | 0.74,2.11        | 0.4              | Yes             |
|                              | Peri   | 971 | 0.75        | 0.34,1.46        | 0.4              |                 |
|                              | Rural  | 938 | <b>1.54</b> | <b>0.99,2.35</b> | <b>0.048</b>     |                 |
| HIV reactive                 | Urban  | 813 | 1.12        | 0.45,2.41        | 0.8              | Yes             |
|                              | Peri   | 971 | <b>2.29</b> | <b>1.15,4.24</b> | <b>0.012</b>     |                 |
|                              | Rural  | 938 | 0.52        | 0.20,1.13        | 0.14             |                 |
| Household density (log)      | Urban  | 813 | <b>2.29</b> | <b>1.32,3.99</b> | <b>0.003</b>     | Yes             |
|                              | Peri   | 971 | 0.95        | 0.57,1.60        | 0.8              |                 |
|                              | Rural  | 938 | <b>2.12</b> | <b>1.24,3.60</b> | <b>0.006</b>     |                 |
| Income<br>(>40,000MK/month)  | Urban  | 813 | 1.16        | 0.76,1.78        | 0.5              | No              |
|                              | Peri   | 971 | 1.10        | 0.73,1.67        | 0.7              |                 |
|                              | Rural  | 938 | 1.04        | 0.71,1.54        | 0.8              |                 |
| Shared Toilet                | Urban  | 813 | 1.39        | 0.91,2.16        | 0.13             | No              |
|                              | Peri   | 971 | 0.87        | 0.55, 1.34       | 0.5              |                 |
|                              | Rural  | 938 | 1.32        | 0.85,2.00        | 0.2              |                 |
| Drophole Present             | Urban  | 813 | 1.07        | 0.60,1.81        | 0.8              | No              |
|                              | Peri   | 971 | 0.96        | 0.61, 1.47       | 0.9              |                 |
|                              | Rural  | 938 | 1.33        | 0.89, 1.98       | 0.2              |                 |
| Cleaning Materials available | Urban  | 813 | 1.07        | 0.64,1.73        | 0.8              | No              |
|                              | Peri   | 971 | 1.06        | 0.70,1.59        | 0.8              |                 |
|                              | Rural  | 938 | 0.78        | 0.39,1.45        | 0.5              |                 |
| Human Feaces visible         | Urban  | 813 | <b>1.58</b> | <b>1.03,2.44</b> | <b>0.039</b>     | Yes             |
|                              | Peri   | 971 | 1.44        | 0.90,2.25        | 0.12             |                 |
|                              | Rural  | 938 | 1.01        | 0.68,1.49        | >0.9             |                 |



|                                |       |     |             |                  |              |     |
|--------------------------------|-------|-----|-------------|------------------|--------------|-----|
| Human defecation practiced     | Urban | 813 | 0.79        | 0.19,2.30        | 0.7          | No  |
|                                | Peri  | 971 | 0.75        | 0.36,1.41        | 0.4          |     |
|                                | Rural | 938 | 0.64        | 0.31,1.21        | 0.2          |     |
| HWF present                    | Urban | 813 | 1.55        | 1.00,2.42        | 0.053        | No  |
|                                | Peri  | 971 | 1.02        | 0.60,1.86        | >0.9         |     |
|                                | Rural | 938 | 1.29        | 0.88,1.93        | 0.2          |     |
| Soap present                   | Urban | 813 | 1.19        | 0.56,2.30        | 0.6          | No  |
|                                | Peri  | 971 | 0.72        | 0.46,1.10        | 0.13         |     |
|                                | Rural | 938 | 0.31        | 0.05,1.04        | 0.11         |     |
| Stored water covered           | Urban | 813 | 0.83        | 0.46,1.58        | 0.5          | No  |
|                                | Peri  | 971 | 0.73        | 0.48,1.12        | 0.14         |     |
|                                | Rural | 938 | 1.08        | 0.73,1.60        | 0.7          |     |
| Stored water covered and tap   | Urban | 813 | 0.84        | 0.54,1.31        | 0.5          | No  |
|                                | Peri  | 971 | 0.68        | 0.28,1.42        | 0.3          |     |
|                                | Rural | 938 | 1.06        | 0.71,1.58        | 0.8          |     |
| Utensil water                  | Urban | 813 | 0.80        | 0.50,1.26        | 0.3          | No  |
|                                | Peri  | 971 | 0.62        | 0.25,1.28        | 0.2          |     |
|                                | Rural | 938 | 0.88        | 0.49,1.48        | 0.6          |     |
| Piped water (i.e. kiosk)       | Urban | 813 | 1.53        | 1.00,2.34        | 0.052        | No  |
|                                | Peri  | 971 | 0.85        | 0.52,1.36        | 0.5          |     |
|                                | Rural | 938 | 1.36        | 0.84,2.15        | 0.2          |     |
| Tap water (i.e. household tap) | Urban | 813 | 0.66        | 0.43,1.02        | 0.061        | No  |
|                                | Peri  | 971 | 1.31        | 0.69,2.33        | 0.4          |     |
|                                | Rural | 938 | 0.21        | 0.01, 1.00       | 0.13         |     |
| Tube well water                | Urban | 813 | 0.91        | 0.34,2.03        | 0.8          | No  |
|                                | Peri  | 971 | 1.08        | 0.71,1.67        | 0.7          |     |
|                                | Rural | 938 | 0.80        | 0.51, 1.28       | 0.3          |     |
| Animal owned by household      | Urban | 813 | 1.39        | 0.91,2.13        | 0.13         | No  |
|                                | Peri  | 971 | 0.81        | 0.53,1.22        | 0.3          |     |
|                                | Rural | 938 | 0.70        | 0.43, 1.20       | 0.2          |     |
| Cattle or ruminant owned       | Urban | 813 | NA          | NA               | NA           | No  |
|                                | Peri  | 971 | 1.06        | 0.59,1.80        | 0.8          |     |
|                                | Rural | 938 | 1.22        | 0.83,1.80        | 0.3          |     |
| Poultry owned                  | Urban | 813 | <b>1.46</b> | <b>1.12,2.87</b> | <b>0.013</b> | Yes |
|                                | Peri  | 971 | 1.12        | 0.74,1.69        | 0.6          |     |
|                                | Rural | 938 | 1.37        | 0.88,2.21        | 0.2          |     |
| Pet owned                      | Urban | 813 | 1.33        | 0.55,1.47        | 0.7          | Yes |
|                                | Peri  | 971 | 1.01        | 0.61,1.62        | >0.9         |     |
|                                | Rural | 938 | <b>1.59</b> | <b>1.05,2.39</b> | <b>0.027</b> |     |
| Pig owned                      | Urban | 813 | NA          | NA               | NA           | No  |
|                                | Peri  | 971 | NA          | NA               | NA           |     |
|                                | Rural | 938 | 1.56        | 0.98,2.42        | 0.055        |     |
| Animal kept inside house       | Urban | 813 | 1.46        | 0.87,2.40        | 0.14         | Yes |
|                                | Peri  | 971 | 0.52        | 0.30,0.86        | <b>0.014</b> |     |
|                                | Rural | 938 | <b>1.48</b> | <b>1.00,2.19</b> | <b>0.048</b> |     |
| Animal interacting with food   | Urban | 813 | 1.33        | 0.80,2.15        | 0.3          | No  |
|                                | Peri  | 971 | 0.92        | 0.60,1.40        | 0.7          |     |
|                                | Rural | 938 | 0.69        | 0.46,1.01        | 0.058        |     |

|                      |       |     |             |                  |                  |     |
|----------------------|-------|-----|-------------|------------------|------------------|-----|
| Animal faeces seen   | Urban | 813 | <b>0.63</b> | <b>0.40,0.96</b> | <b>0.036</b>     | Yes |
|                      | Peri  | 971 | 1.42        | 0.82,2.60        | 0.2              |     |
|                      | Rural | 938 | NA          | NA               | NA               |     |
| River water exposure | Urban | 813 | 1.48        | 0.94,2.30        | 0.088            | No  |
|                      | Peri  | 971 | 1.28        | 0.82,2.04        | 0.3              |     |
|                      | Rural | 938 | 0.81        | 0.49,1.28        | >0.9             |     |
| Drain water exposure | Urban | 813 | 1.46        | 0.68,2.85        | 0.3              | Yes |
|                      | Peri  | 971 | 0.91        | 0.45,1.68        | 0.8              |     |
|                      | Rural | 938 | <b>2.82</b> | <b>1.59,4.83</b> | <b>&lt;0.001</b> |     |
| Street food use      | Urban | 813 | 0.52        | 0.30,0.92        | <b>0.036</b>     | Yes |
|                      | Peri  | 971 | 0.86        | 0.48,1.67        | 0.6              |     |
|                      | Rural | 938 | 0.90        | 0.59,1.41        | 0.6              |     |
| Shared plates        | Urban | 813 | 0.71        | 0.42,1.16        | 0.2              | Yes |
|                      | Peri  | 971 | 0.84        | 0.54,1.27        | 0.4              |     |
|                      | Rural | 938 | <b>0.64</b> | <b>0.43,0.95</b> | <b>0.025</b>     |     |
| Market produce used  | Urban | 813 | 1.13        | 0.56,2.63        | 0.7              | No  |
|                      | Peri  | 971 | 0.80        | 0.44,1.55        | 0.5              |     |
|                      | Rural | 938 | 1.13        | 0.75,1.71        | 0.6              |     |

**S9a Table.** Table of parameter testing for regional adjustment of variables included in the ESBL *E. coli* mixed effects model

| Characteristic                 | Likelihood ratio test            | Adjust for Region* |
|--------------------------------|----------------------------------|--------------------|
| Season                         | $\chi^2 (2) = 8.33, p = 0.0155$  | Yes                |
| Male                           | NA                               |                    |
| Age                            | $\chi^2 (2) = 0.80, p = 0.67$    | No                 |
| ABU                            | NA                               |                    |
| HIV reactive                   | NA                               |                    |
| Household density              | $\chi^2 (2) = 4.82, p = 0.090$   | No                 |
| Income >40,000MK/month         | NA                               |                    |
| Shared Toilet                  | $\chi^2 (2) = 4.93, p = 0.085$   | No                 |
| Drophole Present               | $\chi^2 (2) = 8.51, p = 0.014$   | Yes                |
| Cleaning Materials available   | $\chi^2 (2) = 7.66, p = 0.022$   | Yes                |
| Human Faeces visible           | $\chi^2 (2) = 7.88, p = 0.019$   | Yes                |
| Human defecation practiced     | $\chi^2 (2) = 5.64, p = 0.059$   | No                 |
| HWF present                    | NA                               |                    |
| Soap present                   | $\chi^2 (2) = 14.32, p = <0.001$ | Yes                |
| Stored water covered           | $\chi^2 (2) = 26.52, p = <0.001$ | Yes                |
| Stored water covered and tap   | NA                               |                    |
| Utensil water                  | NA                               |                    |
| Piped water (i.e. kiosk)       | $\chi^2 (2) = 4.39, p = 0.111$   | No                 |
| Tap water (i.e. household tap) | $\chi^2 (2) = 6.92, p = 0.031$   | Yes                |
| Tube well water                | $\chi^2 (2) = 4.28, p = 0.117$   | No                 |

|                              |                                  |     |
|------------------------------|----------------------------------|-----|
| Animal owned by household    | $\chi^2 (2) = 19.61, p = <0.001$ | Yes |
| Cattle or ruminant owned     | NA                               |     |
| Poultry owned                | $\chi^2 (2) = 8.91, p = 0.011$   | Yes |
| Pet owned                    | $\chi^2 (2) = 7.63, p = 0.022$   | Yes |
| Pig owned                    | NA                               |     |
| Animal kept inside house     | $\chi^2 (2) = 1.34, p = 0.510$   | No  |
| Animal interacting with food | $\chi^2 (2) = 0.94, p = 0.624$   | No  |
| Animal faeces seen           | NA                               |     |
| River water exposure         | $\chi^2 (2) = 7.36, p = 0.025$   | Yes |
| Drain water exposure         | $\chi^2 (2) = 8.23, p = 0.016$   | Yes |
| Street food use              | $\chi^2 (2) = 20.84, p = <0.001$ | Yes |
| Shared plates                | $\chi^2 (2) = 5.72, p = 0.057$   | No  |
| Market produce used          | NA                               |     |

\*An alpha level 0.05 has been used as a cut off for the decision to adjust for regional effects in the final mixed effect model.

**S9b Table.** Table of parameter testing for regional adjustment of variables included in the ESBL K. *pneumoniae* mixed effects model

| Variable                       | Likelihood ratio test          | Adjust for Region* |
|--------------------------------|--------------------------------|--------------------|
| Season                         | $\chi^2 (2) = 3.25, p = 0.197$ | No                 |
| Male                           | NA                             |                    |
| Age                            | NA                             | No                 |
| ABU                            | $\chi^2 (2) = 3.08, p = 0.215$ | No                 |
| HIV reactive                   | $\chi^2 (2) = 7.87, p = 0.020$ | Yes                |
| Household density              | $\chi^2 (2) = 6.53, p = 0.038$ | Yes                |
| Income >40,000MK/month         | NA                             |                    |
| Shared Toilet                  | NA                             |                    |
| Drophole Present               | NA                             |                    |
| Cleaning Materials available   | NA                             |                    |
| Human Faeces visible           | $\chi^2 (2) = 2.56, p = 0.278$ | No                 |
| Human defecation practiced     | NA                             |                    |
| HWF present                    | NA                             |                    |
| Soap present                   | NA                             |                    |
| Stored water covered           | NA                             |                    |
| Stored water covered and tap   | NA                             |                    |
| Utensil water                  | NA                             |                    |
| Piped water (i.e. kiosk)       | NA                             |                    |
| Tap water (i.e. household tap) | NA                             |                    |
| Tube well water                | NA                             |                    |
| Animal owned by household      | NA                             |                    |
| Cattle or ruminant owned       | NA                             |                    |

|                                     |                                 |     |
|-------------------------------------|---------------------------------|-----|
| <b>Poultry owned</b>                | $\chi^2 (2) = 2.24, p = 0.327$  | No  |
| <b>Pet owned</b>                    | $\chi^2 (2) = 3.46, p = 0.177$  | No  |
| <b>Pig owned</b>                    | NA                              |     |
| <b>Animal kept inside house</b>     | $\chi^2 (2) = 12.39, p = 0.002$ | Yes |
| <b>Animal interacting with food</b> | NA                              |     |
| <b>Animal faeces seen</b>           | $\chi^2 (2) = 5.56, p = 0.062$  | No  |
| <b>River water exposure</b>         | NA                              |     |
| <b>Drain water exposure</b>         | $\chi^2 (2) = 7.02, p = 0.030$  | Yes |
| <b>Street food use</b>              | $\chi^2 (2) = 2.54, p = 0.281$  | No  |
| <b>Shared plates</b>                | $\chi^2 (2) = 0.81, p = 0.665$  | No  |
| <b>Market produce used</b>          | NA                              |     |

*\*An alpha level 0.05 has been used as a cut off for the decision to adjust for regional effects in the final mixed effect model.*

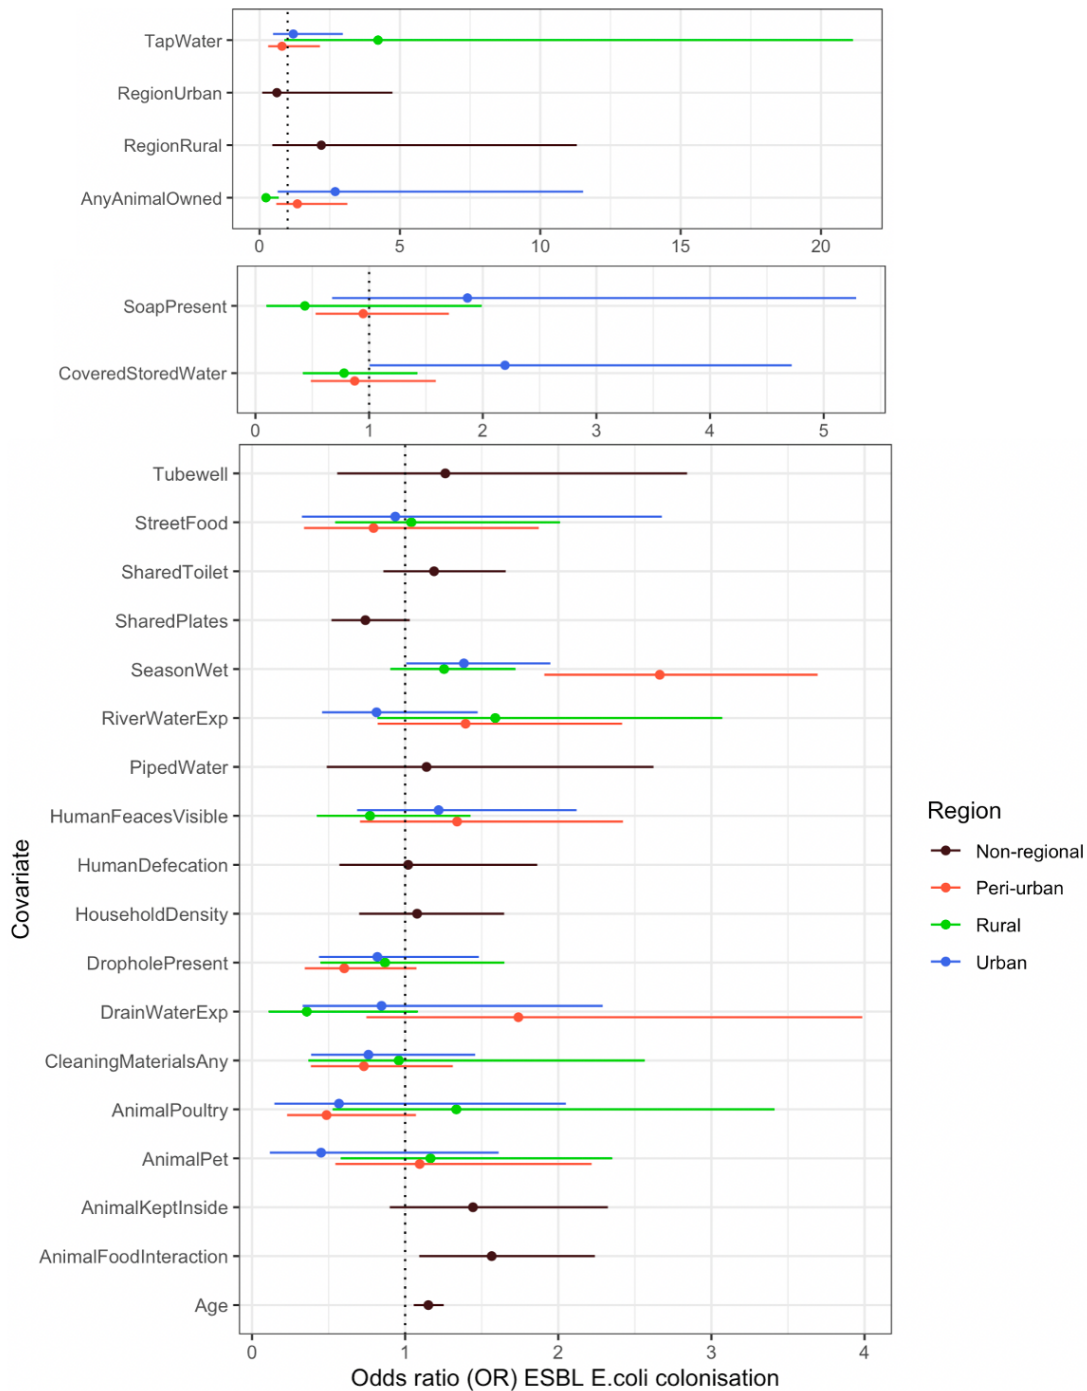

**S1a Fig.** Parameter estimates for the fixed-effects used in a multivariable model of ESBL *E. coli* colonisation, expressed as odds ratios with 95% CrI. Covariates either included an interaction term by region (and so their effect varies by region - red=peri-urban, green=rural or blue=urban) or had the same effect across region (black). \*Covariates that were significantly associated ( $p < 0.05$ ) with colonisation via univariable analysis in any region were evaluated for a different effect across regions by comparing models with and without a covariate\*region interaction term using likelihood ratio

testing for both ESBL *E. coli* and ESBL *K. pneumoniae*. An interaction term with region was included for those covariates for which  $p < 0.05$  on likelihood ratio testing (S7a Table).

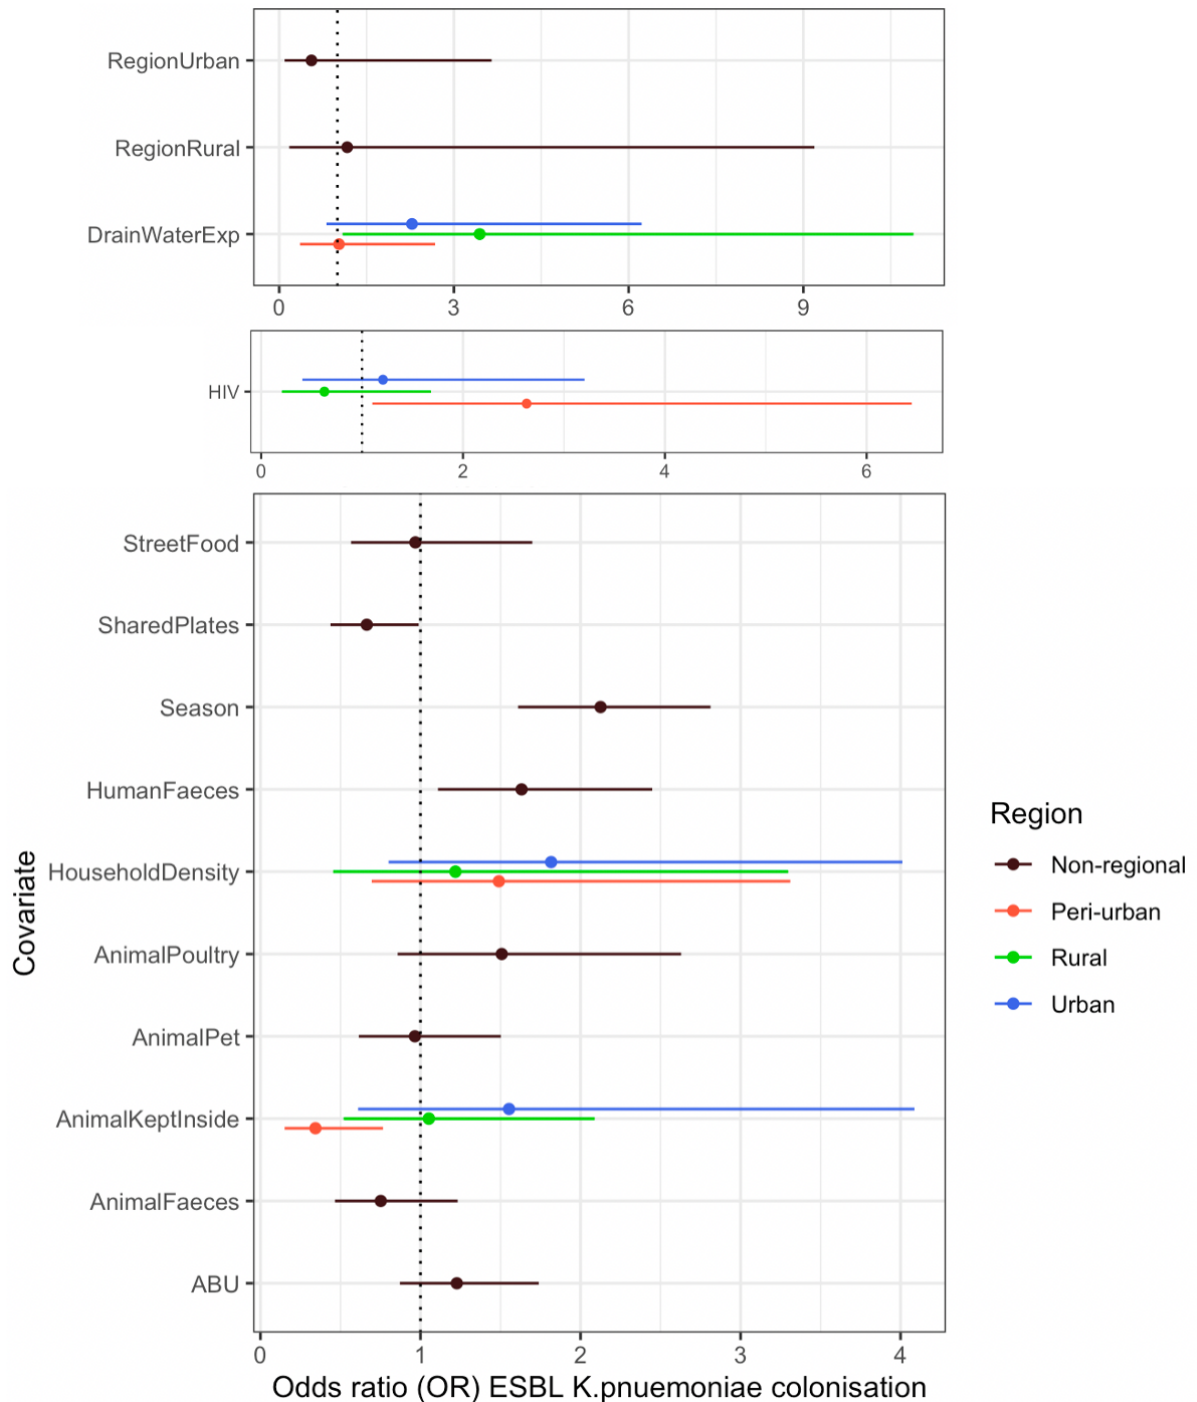

**S1b Fig.** Parameter estimates for the fixed-effects used in a multivariable model of ESBL *K. pneumoniae* colonisation, expressed as odds ratios with 95% CrI. Covariates either included an interaction term by region (and so their effect varies by region - red=peri-urban, green=rural or

blue=urban) or had the same effect across regions (black). \*Covariates that were significantly associated ( $p < 0.05$ ) with colonisation via univariable analysis in any region were evaluated for a different effect across regions by comparing models with and without a covariate\*region interaction term using likelihood ratio testing for both ESBL *E. coli* and ESBL *K. pneumoniae*. An interaction term with region was included for those covariates for which  $p < 0.05$  on likelihood ratio testing (S7b Table).

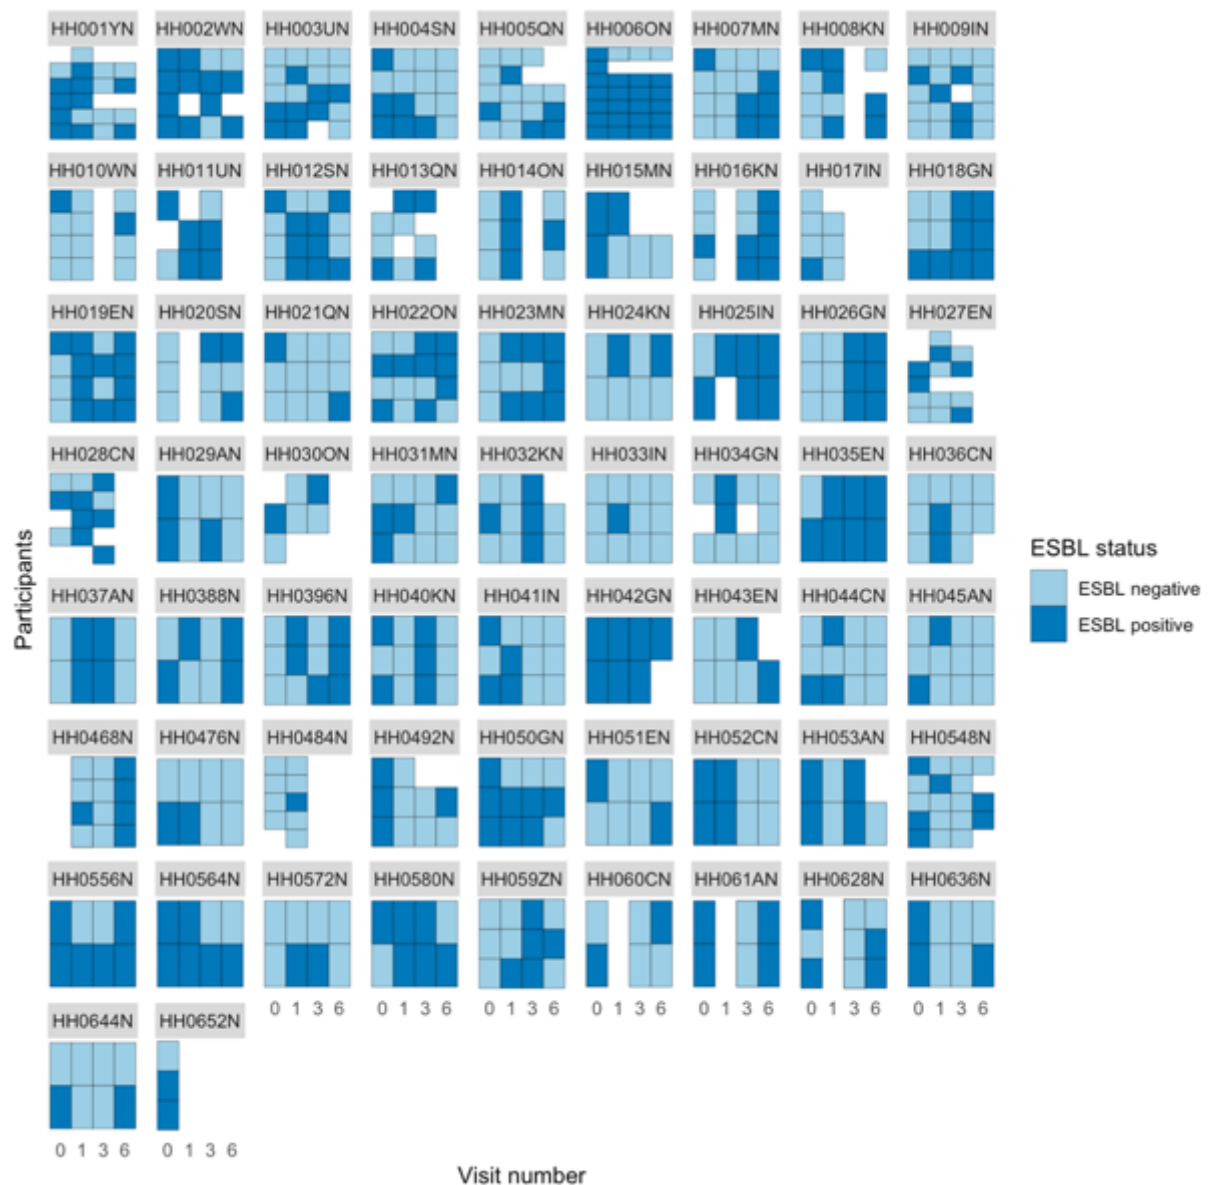

**S2a Fig.** Facet Plot showing flux of human ESBL (*E. coli* or *K. pneumoniae*) colonisation amongst **urban** household members over time, grouped by the 65 households recruited. Each row represents a participant, each column represents a visit, and each small square is a sample coloured by EBSL status

(positive or negative). Where no sample was returned for an individual at a visit the square remains blank.

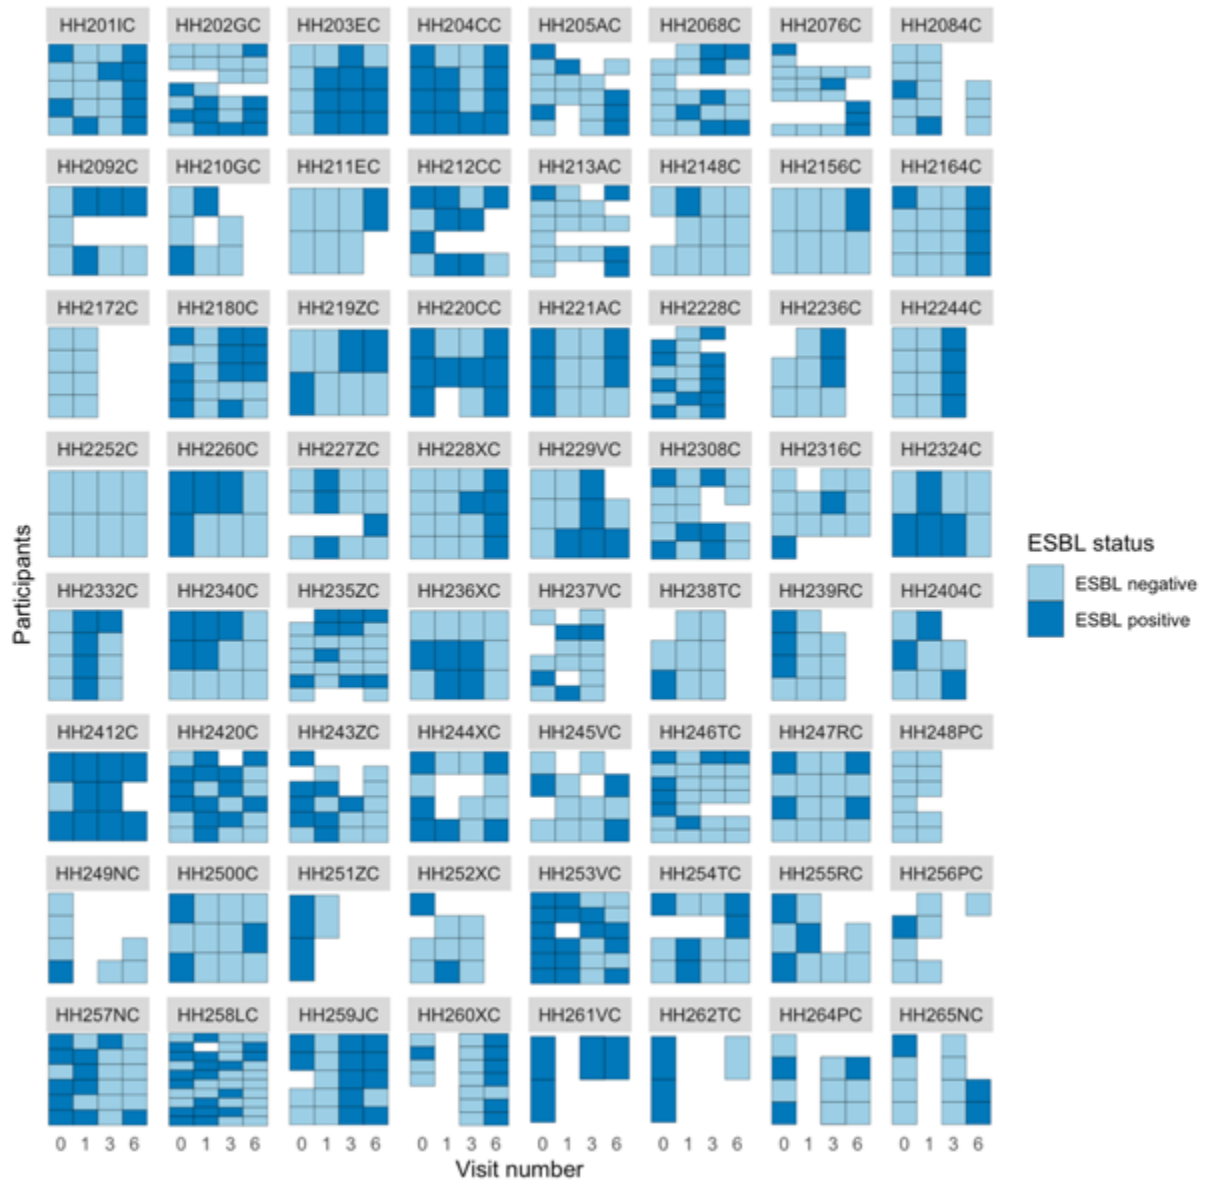

**S2b Fig.** Facet Plot showing flux of human ESBL colonisation (*E. coli* or *K. pneumoniae*) amongst **peri-urban** household members over time, grouped by the 65 households recruited. Each row represents a participant, each column represents a visit, and each small square is a sample coloured by EBSL status (positive or negative). Where no sample was returned for an individual at a visit the square remains blank.



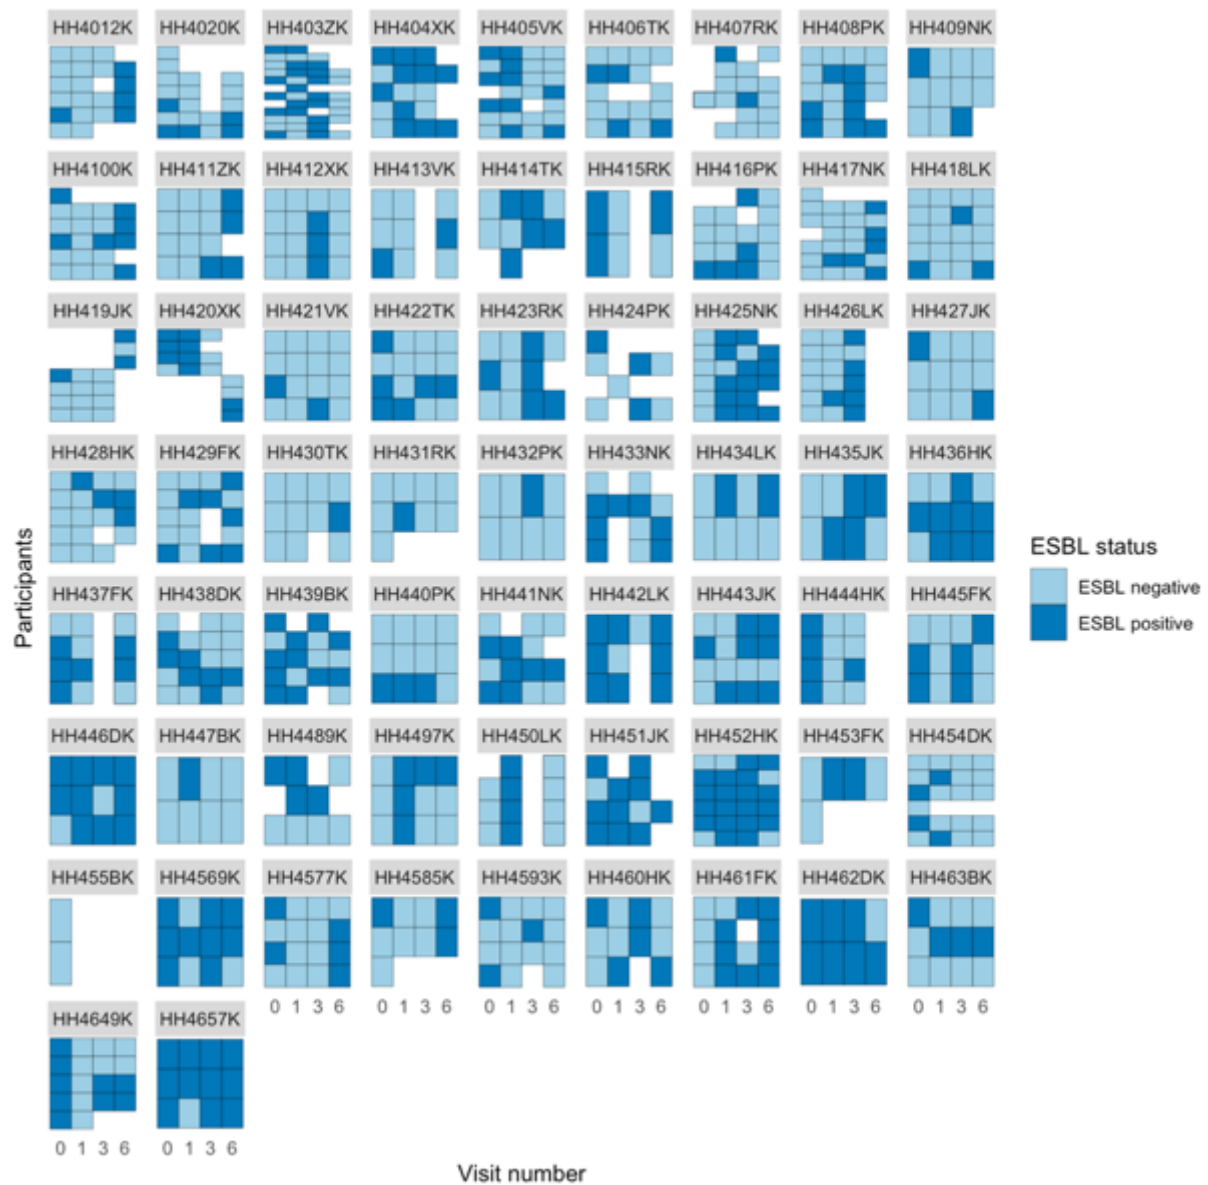

**S2c Fig.** Facet Plot showing flux of human ESBL (*E. coli* or *K. pneumoniae*) colonisation amongst rural household members over time, grouped by the 65 households recruited. Each row represents a participant, each column represents a visit, and each small square is a sample coloured by EBSL status (positive or negative). Where no sample was returned for an individual at a visit the square remains blank.

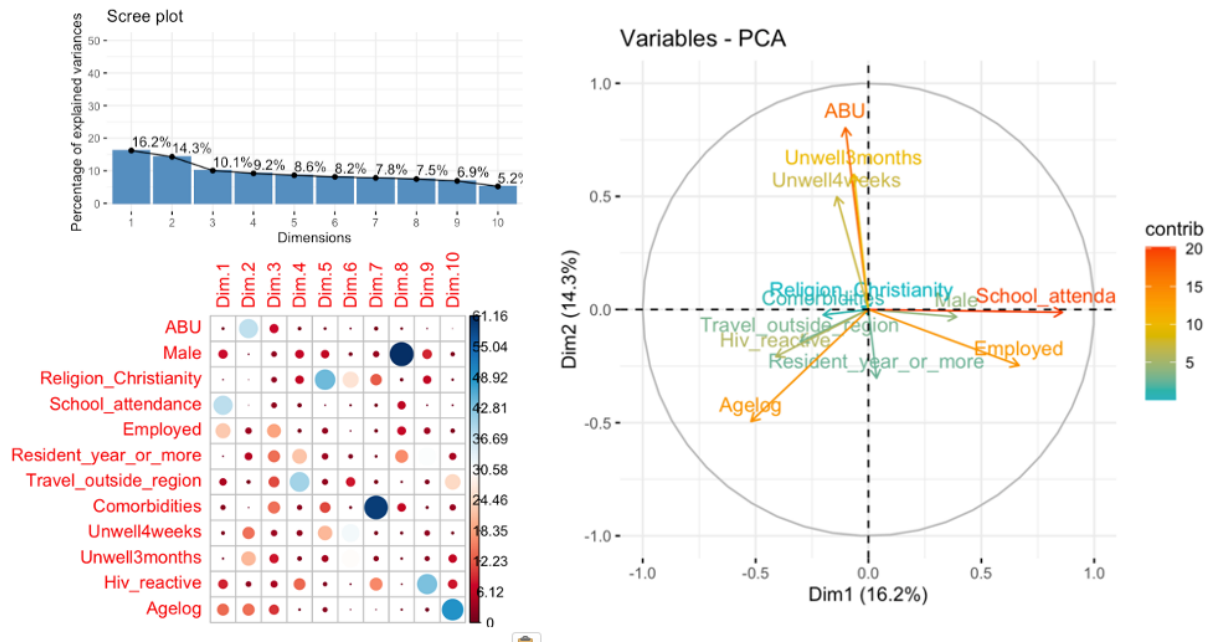

**S3a Fig.** PCA analysis of individual variables, including a scree plot of the eigenvalues (top left), weighting of the variables by PCA (bottom left), and factor map (right).

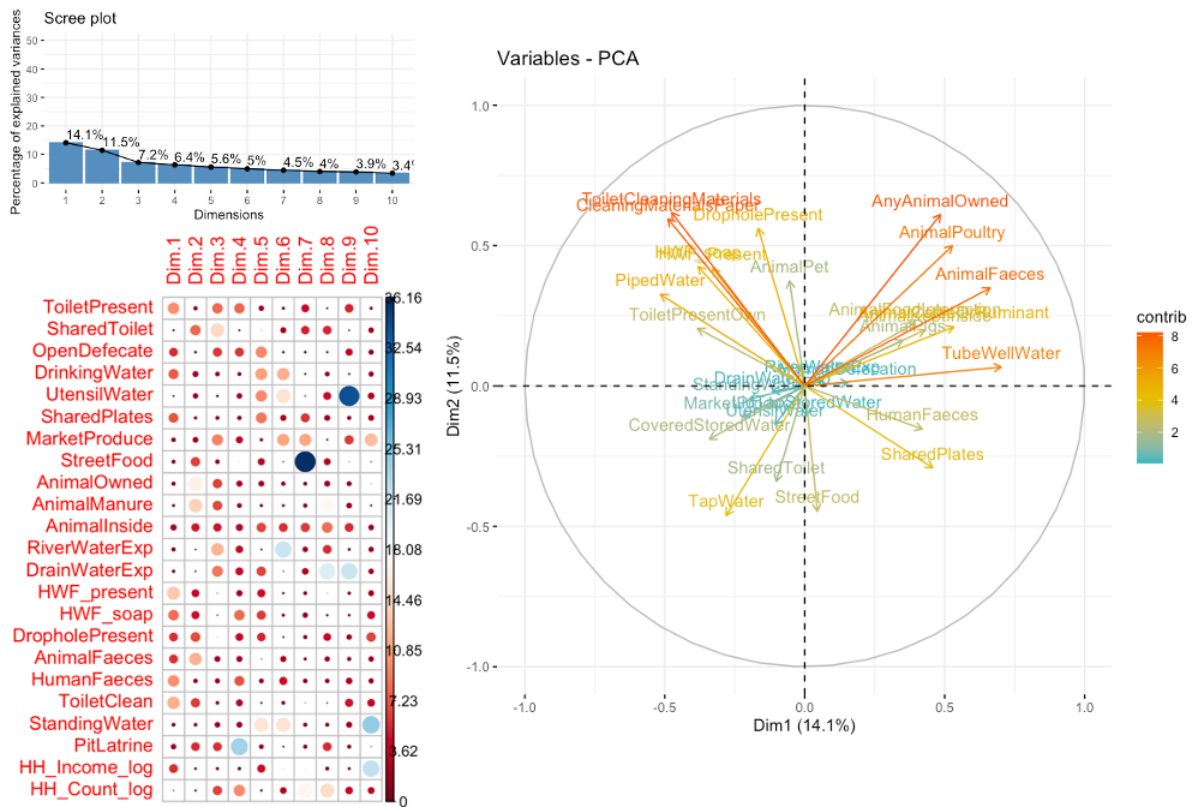

**S3b Fig.** PCA analysis of household variables, including a scree plot of the eigenvalues (top left), weighting of the variables by PCA (bottom left), and factor map (right).

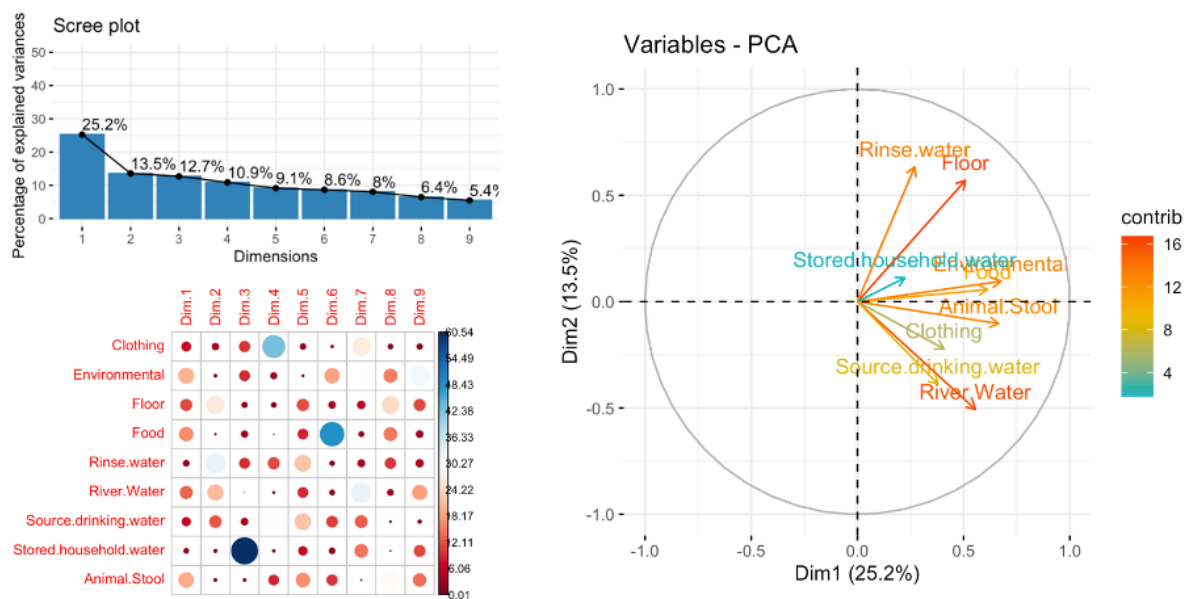

**S3c Fig.** PCA analysis of environmental contamination variables, including a scree plot of the eigenvalues (top left), weighting of the variables by PCA (bottom left), and factor map (right).

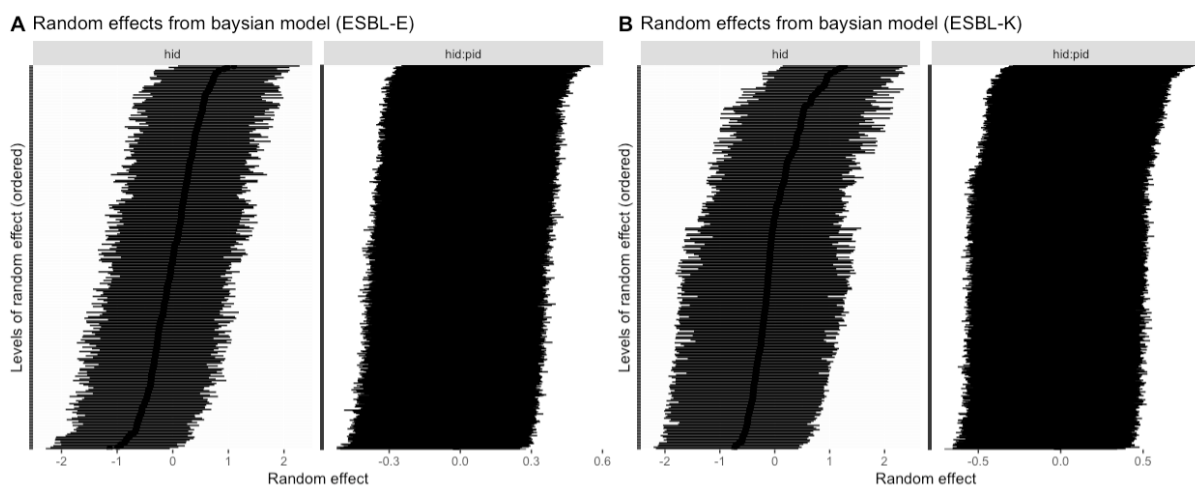

**S4 Fig.** Random effects from Bayesian multivariate models of (a) ESBL *E. coli* [ESBL-E], and (b) ESBL *K. pneumoniae* [ESBL-K], inclusive of within household (hid) and within participant (hid:pid) effects.
